# Supplementary material for: Design, synthesis, theoretical study, antioxidant, and anticholinesterase activities of new pyrazolo-fused phenanthrolines
Source: Royal Society of Chemistry journal article supplement (doi:10.1039/d2ra05532e), 2022-01-01
Supplement: d2ra05532e1.pdf [file d2ra05532e1.pdf]

## Design, synthesis, theoretical study, antioxidant, and anticholinesterase activities of new Pyrazolo-fused phenanthrolines.

Efraín Polo-Cuadrado<sup>1,\*</sup>, Cristian Rojas-Peña<sup>1,2</sup>, Karen Acosta-Quiroga<sup>1,2</sup>, Lorena Camargo-Ayala<sup>3</sup>, Iván Brito<sup>4</sup>, Jonathan Cisterna<sup>5</sup>, Félix Moncada<sup>6</sup>, Jorge Trilleras<sup>7</sup>, Yeray A. Rodríguez-Núñez<sup>8</sup> and Margarita Gutierrez<sup>1,\*</sup>

<sup>1</sup> Laboratorio Síntesis Orgánica y Actividad Biológica (LSO-Act-Bio), Instituto de Química de Recursos Naturales, Universidad de Talca, Casilla 747, Talca 3460000, Chile.

<sup>2</sup> Doctorado en Química, Departamento de Química Orgánica y Fisicoquímica, Universidad de Chile, Santiago, Chile.

<sup>3</sup> Doctorado en Ciencias Mención I + D de Productos Bioactivos, Instituto de Química de Recursos Naturales, Laboratorio de Síntesis Orgánica (LSO-Act-Bio), Universidad de Talca, Casilla 747, Talca 3460000, Chile.

<sup>4</sup> Departamento de Química, Facultad de Ciencias Básicas, Universidad de Antofagasta, Avda., Universidad de Antofagasta, Campus Coloso, Antofagasta 02800, Chile.

<sup>5</sup> Departamento de Química, Facultad de Ciencias, Universidad de Católica del Norte, Sede Casa Central, Av. Angamos 0610, Antofagasta, Chile

<sup>6</sup> Departamento de Química, Universidad Nacional de Colombia, Av. Cra 30 # 45-03, Bogotá, Colombia.

<sup>7</sup> Grupo de Investigación en Compuestos Heterocíclicos, Universidad del Atlántico, Puerto Colombia 08007, Colombia

<sup>8</sup> Departamento de Química, Facultad de Ciencias Exactas, Universidad Andrés Bello, Republica 275, Santiago, 8370146, Chile.

\*Correspondence: [epolo@utalca.cl](mailto:epolo@utalca.cl) (E.P.-C.); [mgutierrez@utalca.cl](mailto:mgutierrez@utalca.cl) (M.G.)

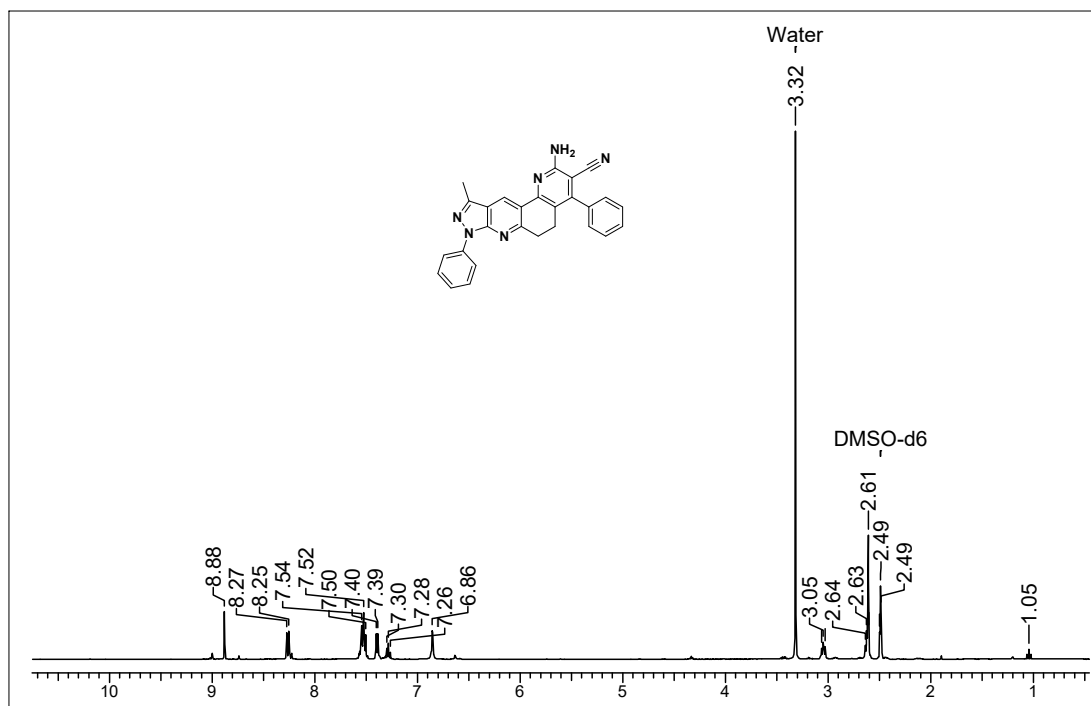

Fig S1. <sup>1</sup>H NMR for 2-amino-10-methyl-4,8-diphenyl-6,8-dihydro-5H-pyrazolo[3,4-j][1,7]phenanthroline-3-carbonitrile (5a)

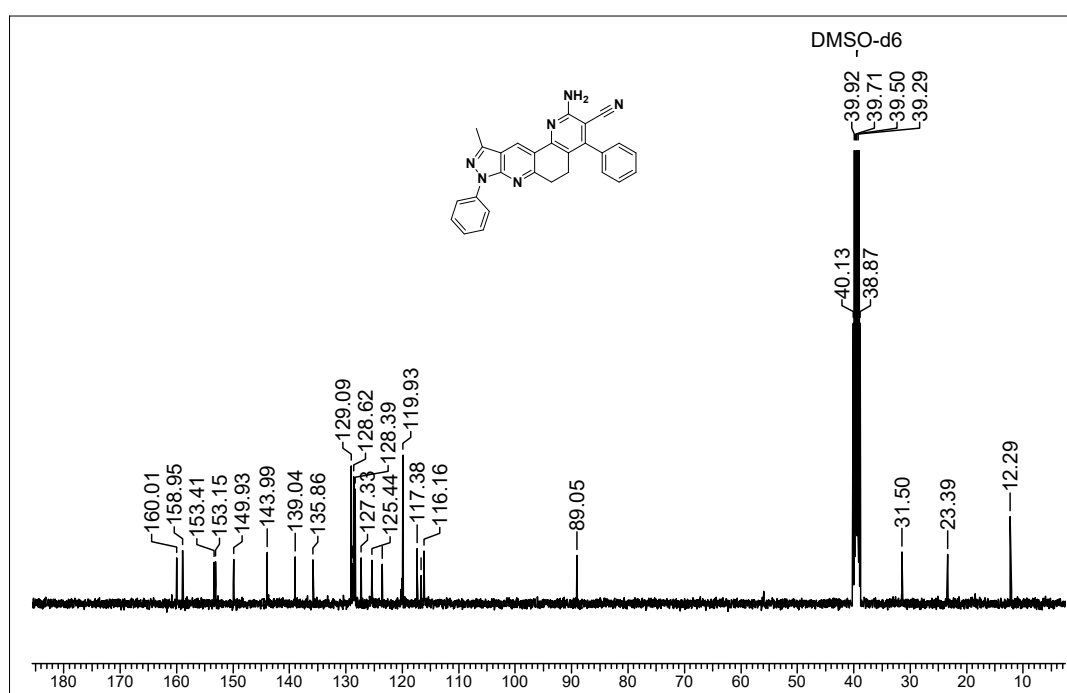

Fig S2. <sup>13</sup>C NMR for 2-amino-10-methyl-4,8-diphenyl-6,8-dihydro-5H-pyrazolo[3,4-j][1,7]phenanthroline-3-carbonitrile (5a)

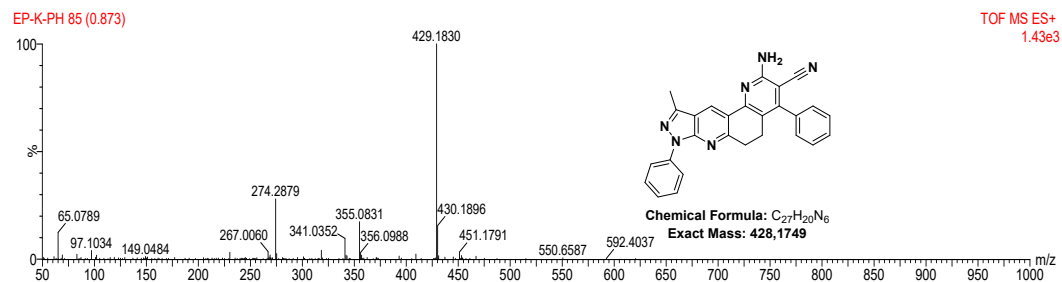

Fig S3. HRMS for 2-amino-10-methyl-4,8-diphenyl-6,8-dihydro-5H-pyrazolo[3,4-j][1,7]phenanthroline-3-carbonitrile (5a)

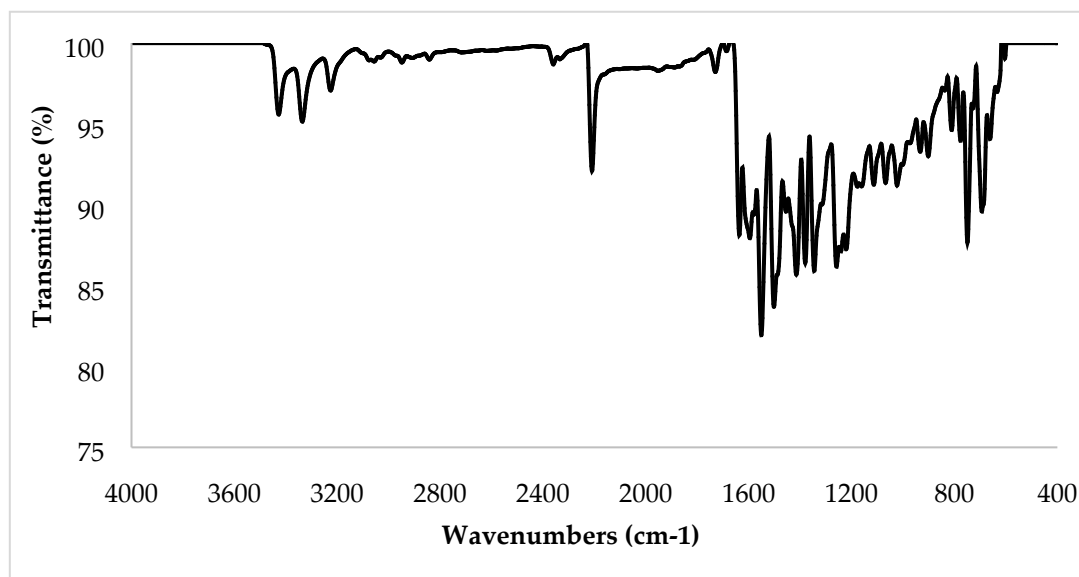

Fig S4. IR spectrum for 2-amino-10-methyl-4,8-diphenyl-6,8-dihydro-5H-pyrazolo[3,4-j][1,7]phenanthroline-3-carbonitrile (5a)

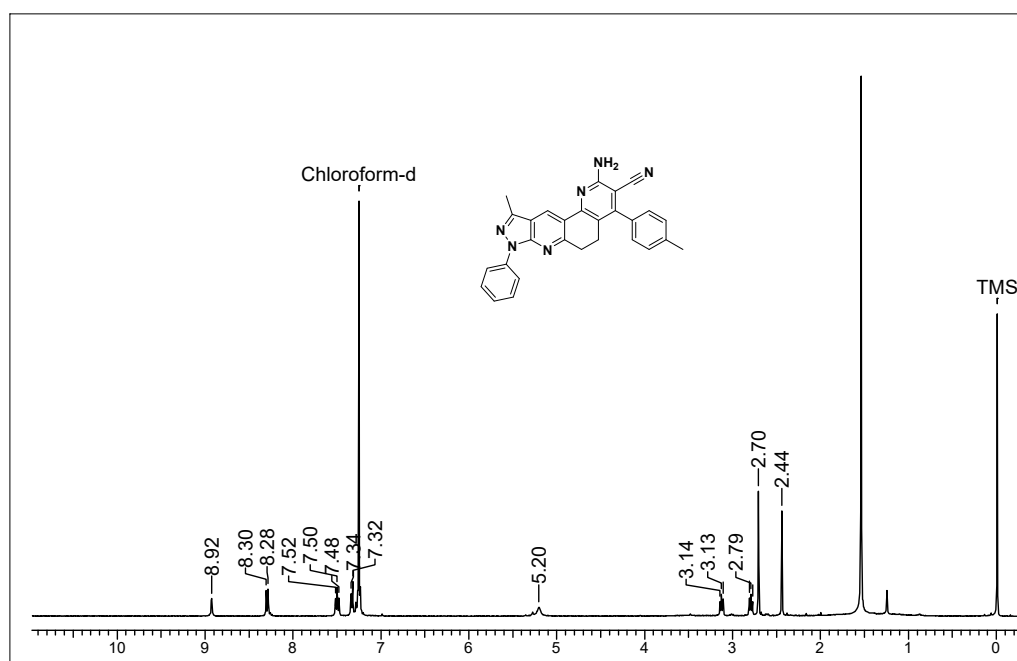

Fig S5. <sup>1</sup>H NMR for 2-amino-10-methyl-8-phenyl-4-(p-tolyl)-6,8-dihydro-5H-pyrazolo[3,4-j][1,7]phenanthroline-3-carbonitrile (5b)

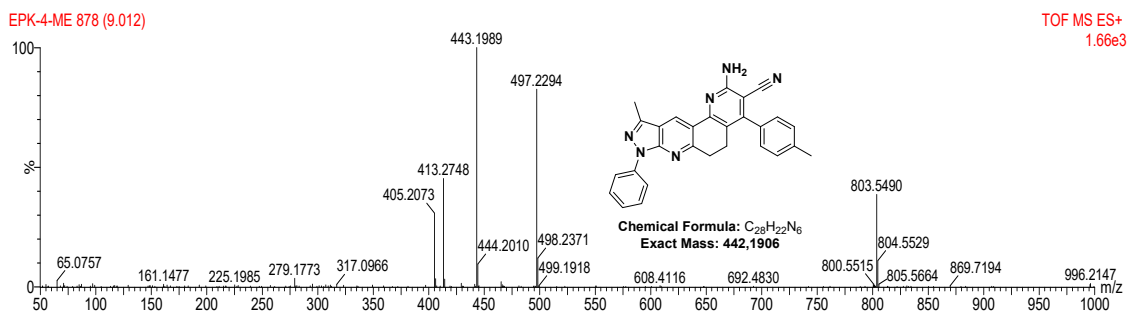

Fig S6. HRMS for 2-amino-10-methyl-8-phenyl-4-(p-tolyl)-6,8-dihydro-5H-pyrazolo[3,4-j][1,7]phenanthroline-3-carbonitrile (**5b**)

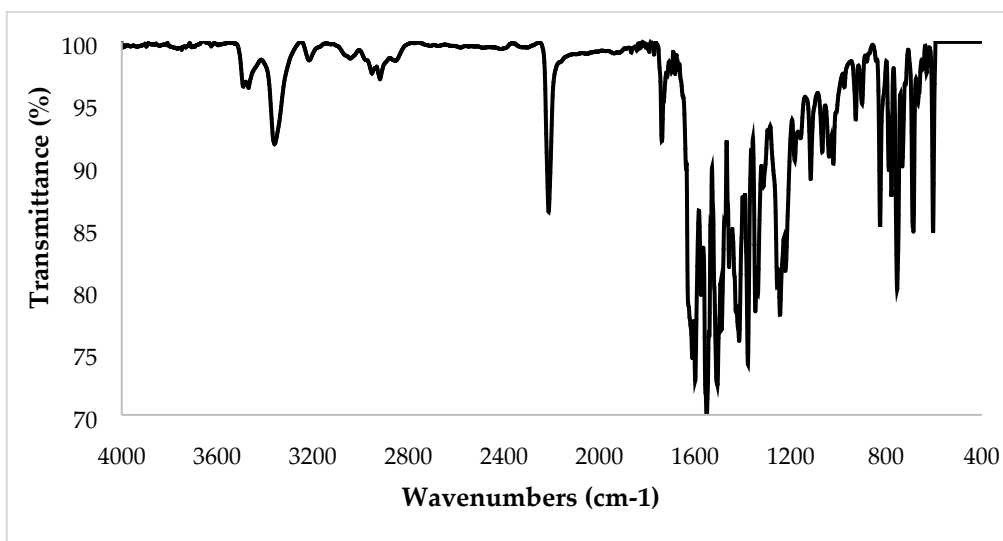

Fig S7. IR spectrum for 2-amino-10-methyl-8-phenyl-4-(p-tolyl)-6,8-dihydro-5H-pyrazolo[3,4-j][1,7]phenanthroline-3-carbonitrile (**5b**)

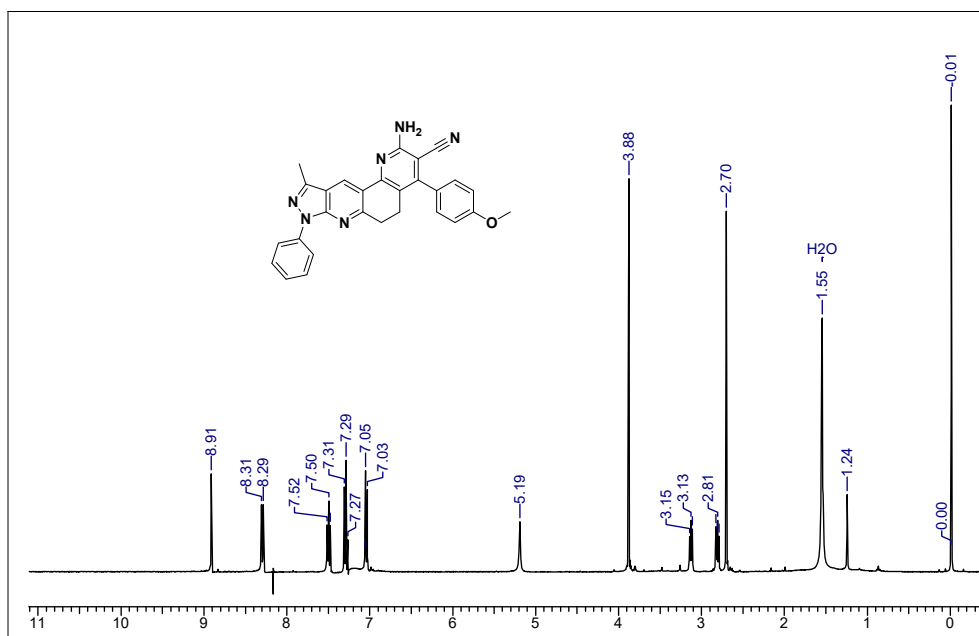

Fig S8.  $^1H$ NMR for 2-amino-4-(4-methoxyphenyl)-10-methyl-8-phenyl-6,8-dihydro-5H-pyrazolo[3,4-j][1,7]phenanthroline-3-carbonitrile (**5c**)

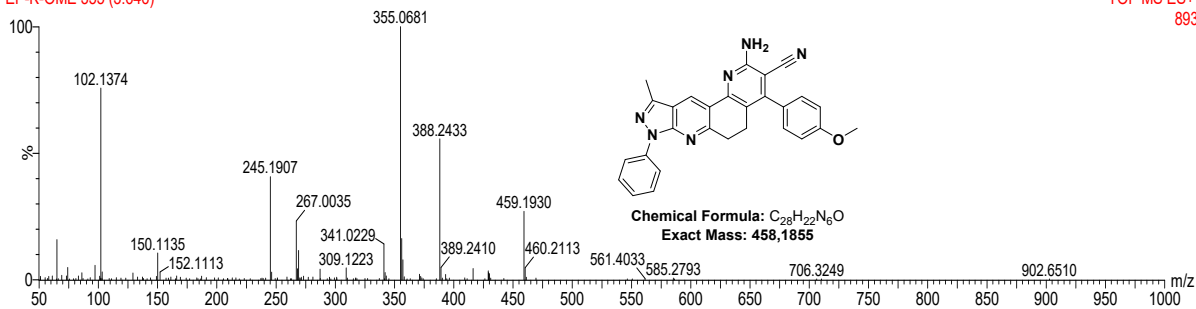

**Fig S9.** HRMS for 2-amino-4-(4-methoxyphenyl)-10-methyl-8-phenyl-6,8-dihydro-5H-pyrazolo[3,4-j][1,7]phenanthroline-3-carbonitrile (**5c**)

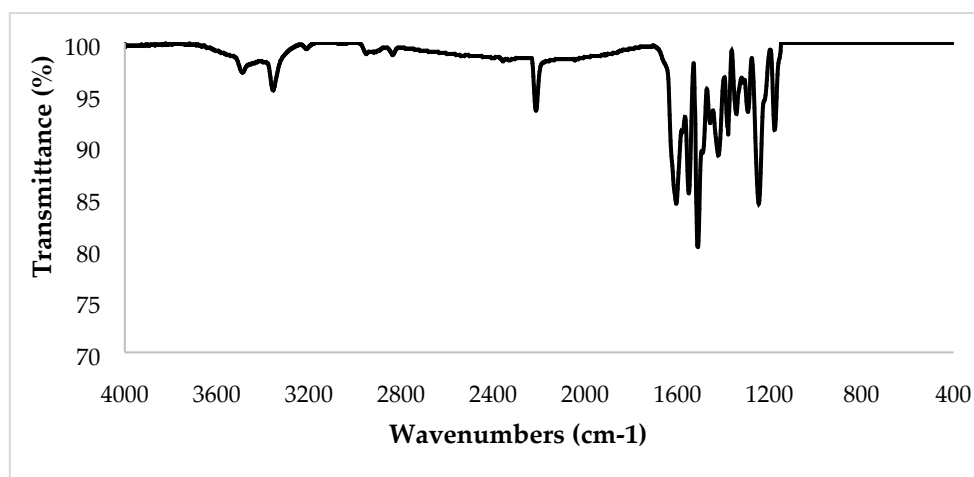

**Fig S10.** IR spectrum for 2-amino-4-(4-methoxyphenyl)-10-methyl-8-phenyl-6,8-dihydro-5H-pyrazolo[3,4-j][1,7]phenanthroline-3-carbonitrile (**5c**)

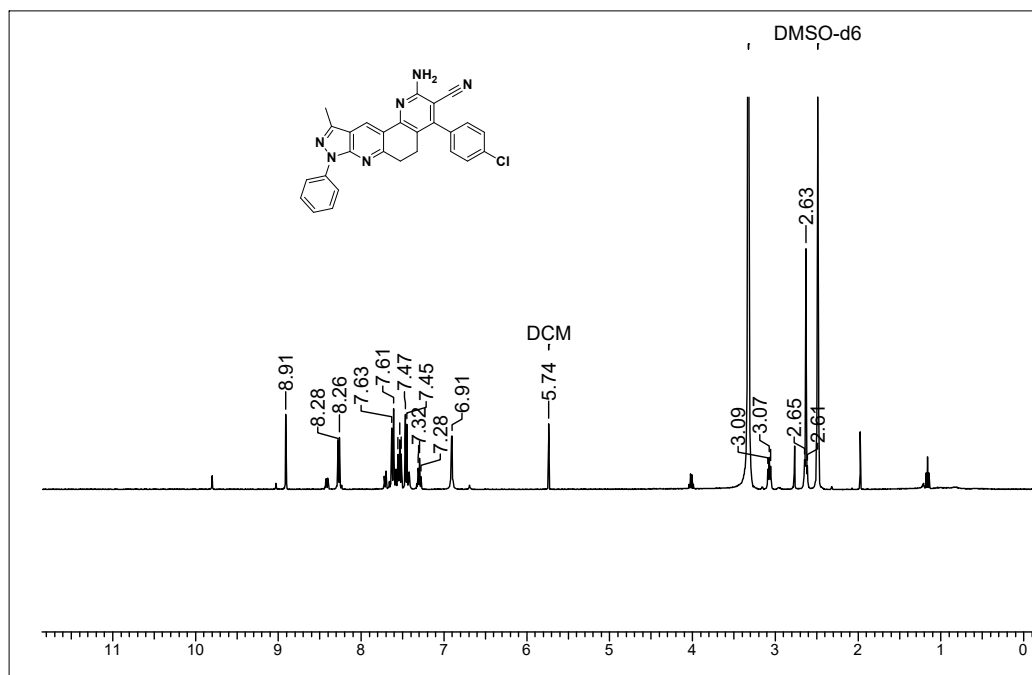

**Fig S11.**  $^1H$  NMR for 2-amino-4-(4-chlorophenyl)-10-methyl-8-phenyl-6,8-dihydro-5H-pyrazolo[3,4-j][1,7]phenanthroline-3-carbonitrile (**5d**)

EP-K-CL P 29 (0.298)

TOF MS ES+  
1.32e3

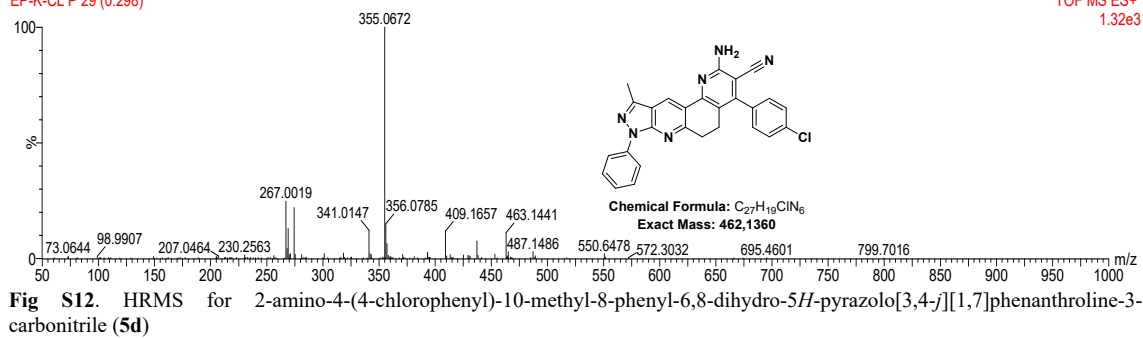

Fig S12. HRMS for 2-amino-4-(4-chlorophenyl)-10-methyl-8-phenyl-6,8-dihydro-5H-pyrazolo[3,4-*j*][1,7]phenanthroline-3-carbonitrile (5d)

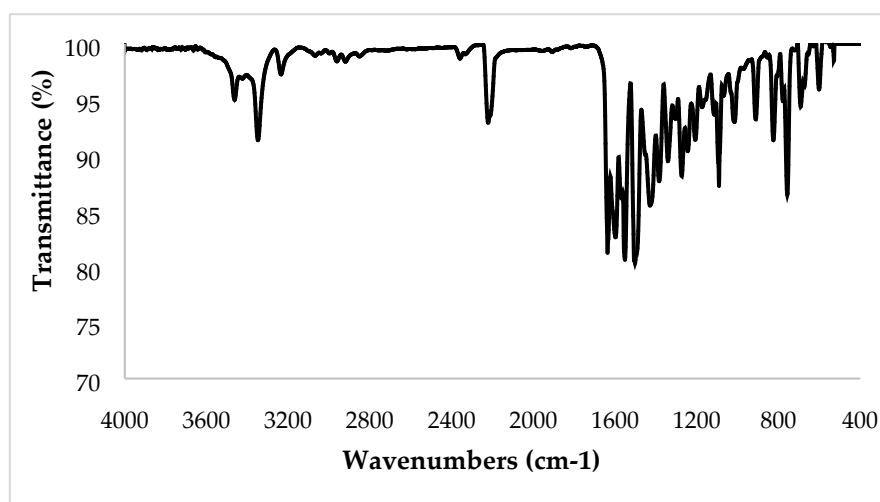

Fig S13. IR spectrum for 2-amino-4-(4-chlorophenyl)-10-methyl-8-phenyl-6,8-dihydro-5H-pyrazolo[3,4-*j*][1,7]phenanthroline-3-carbonitrile (5d)

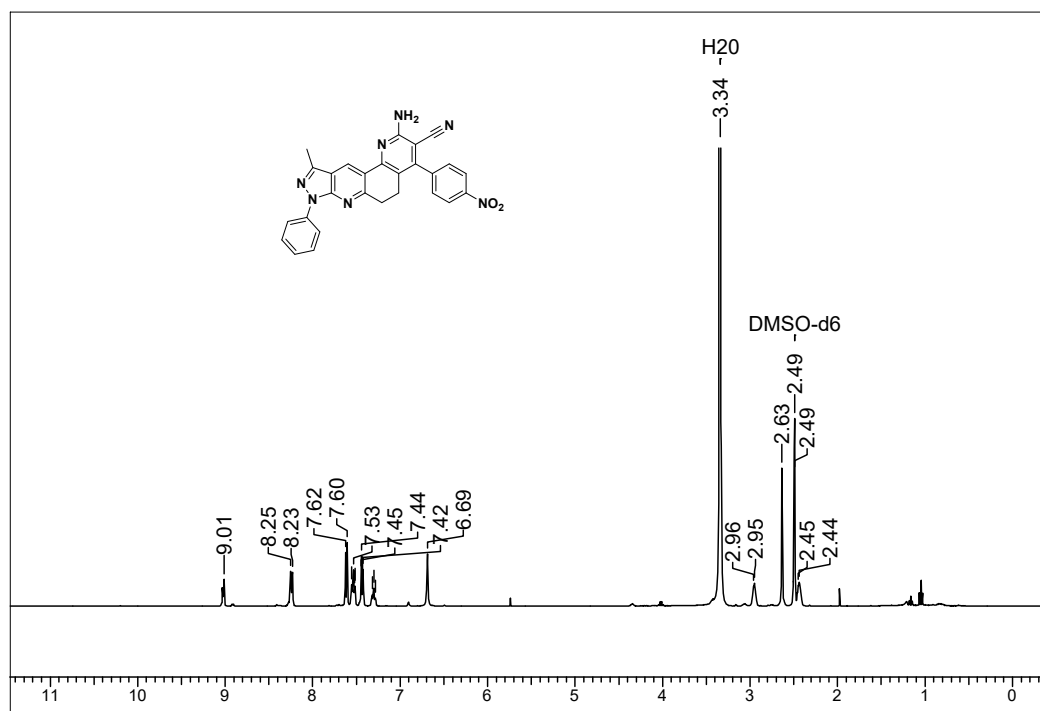

Fig S14.  $^1H$  NMR for 2-amino-10-methyl-4-(4-nitrophenyl)-8-phenyl-6,8-dihydro-5H-pyrazolo[3,4-*j*][1,7]phenanthroline-3-carbonitrile (5e)

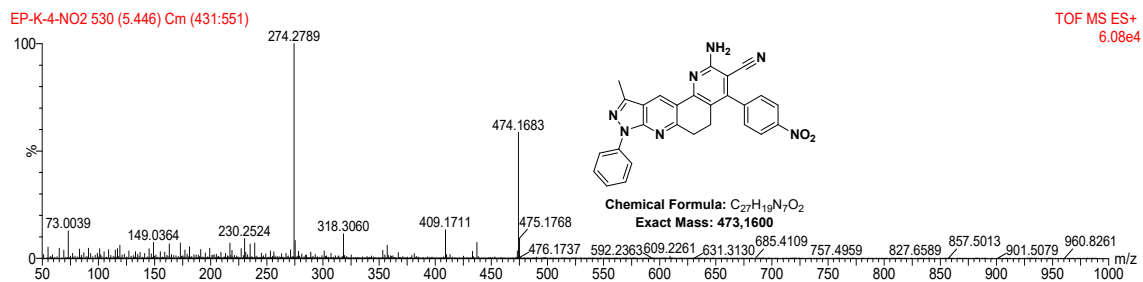

**Fig S15.** HRMS for 2-amino-10-methyl-4-(4-nitrophenyl)-8-phenyl-6,8-dihydro-5H-pyrazolo[3,4-*j*][1,7]phenanthroline-3-carbonitrile (**5e**)

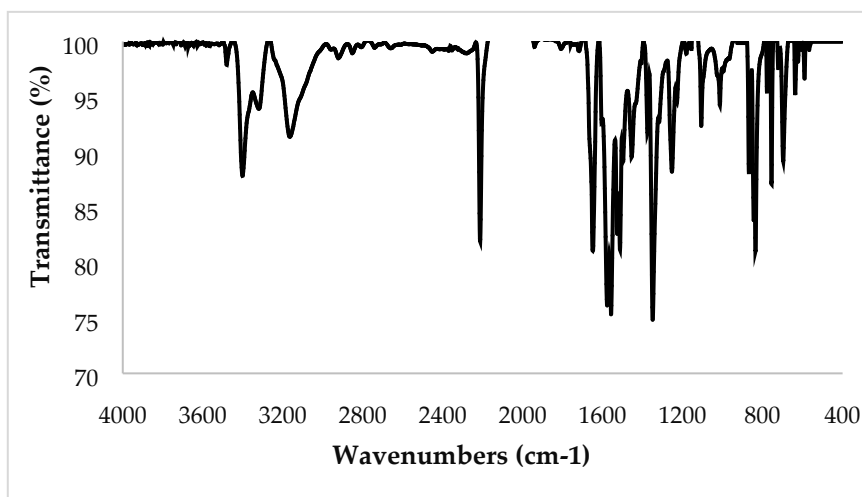

**Fig S16.** IR spectrum for 2-amino-10-methyl-4-(4-nitrophenyl)-8-phenyl-6,8-dihydro-5H-pyrazolo[3,4-*j*][1,7]phenanthroline-3-carbonitrile (**5e**)

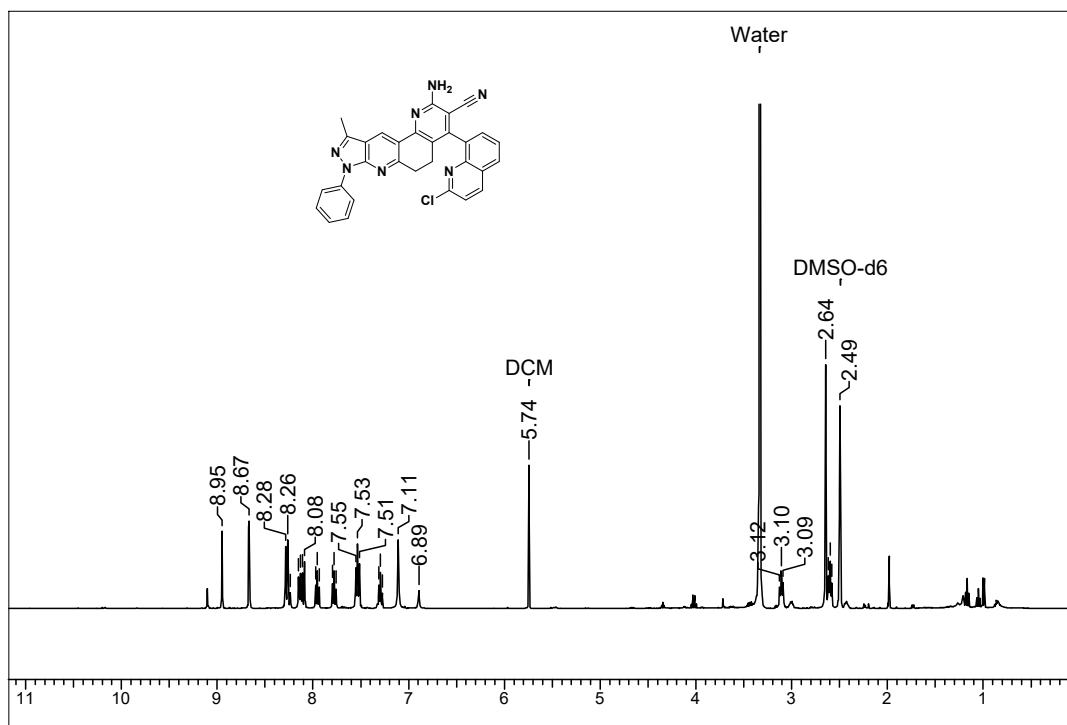

**Fig S17.**  $^1H$  NMR for 2-amino-4-(2-chloroquinolin-3-yl)-10-methyl-8-phenyl-6,8-dihydro-5H-pyrazolo[3,4-*j*][1,7]phenanthroline-3-carbonitrile (**5f**)

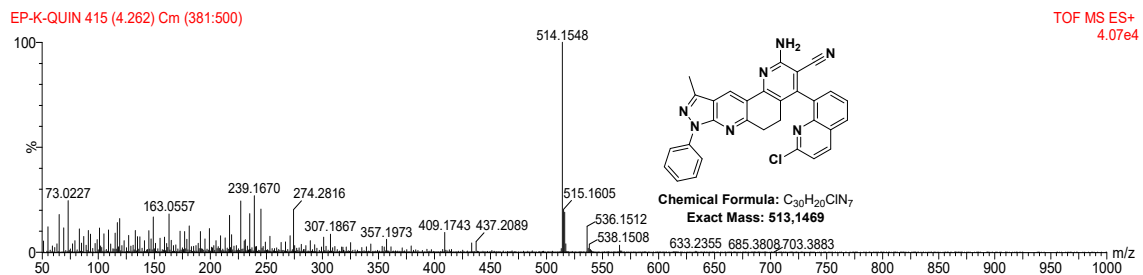

**Fig S18.** HRMS for 2-amino-4-(2-chloroquinolin-3-yl)-10-methyl-8-phenyl-6,8-dihydro-5H-pyrazolo[3,4-*j*][1,7]phenanthroline-3-carbonitrile (**5f**)

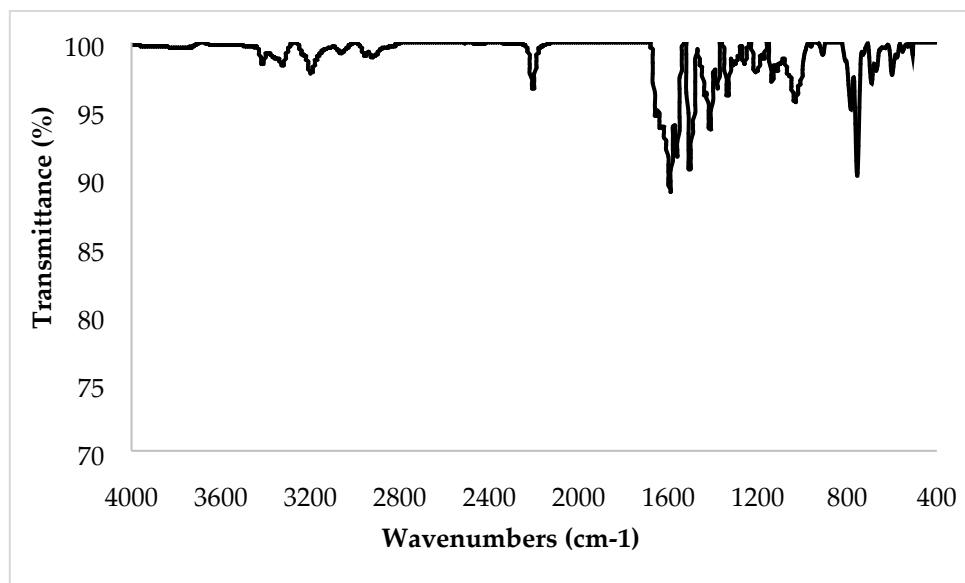

**Fig S19.** IR spectrum for 2-amino-4-(2-chloroquinolin-3-yl)-10-methyl-8-phenyl-6,8-dihydro-5H-pyrazolo[3,4-*j*][1,7]phenanthroline-3-carbonitrile (**5f**)

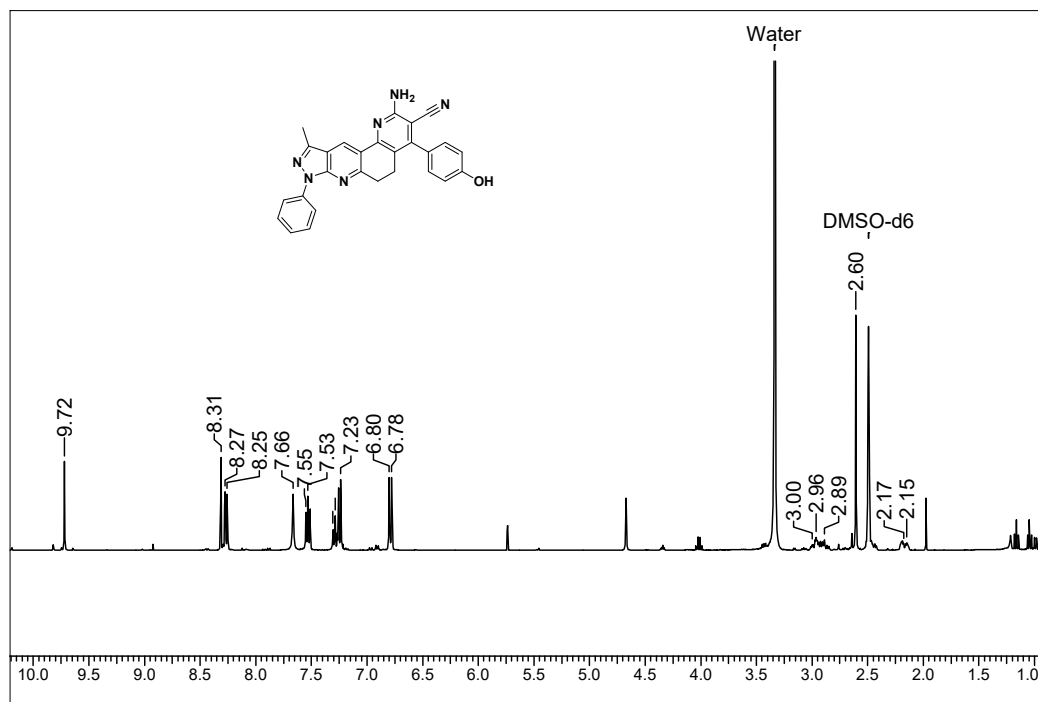

**Fig S20.**  $^1H$  NMR for 2-amino-4-(4-hydroxyphenyl)-10-methyl-8-phenyl-6,8-dihydro-5H-pyrazolo[3,4-*j*][1,7]phenanthroline-3-carbonitrile (**5g**)



EP-MORFIN P 240 (2.464)

TOF MS ES+  
4.71e3

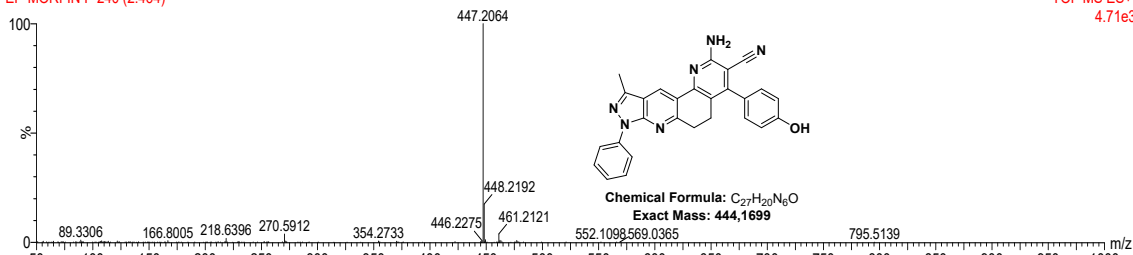

Fig S21. HRMS for 2-amino-4-(4-hydroxyphenyl)-10-methyl-8-phenyl-6,8-dihydro-5H-pyrazolo[3,4-j][1,7]phenanthroline-3-carbonitrile (5g)

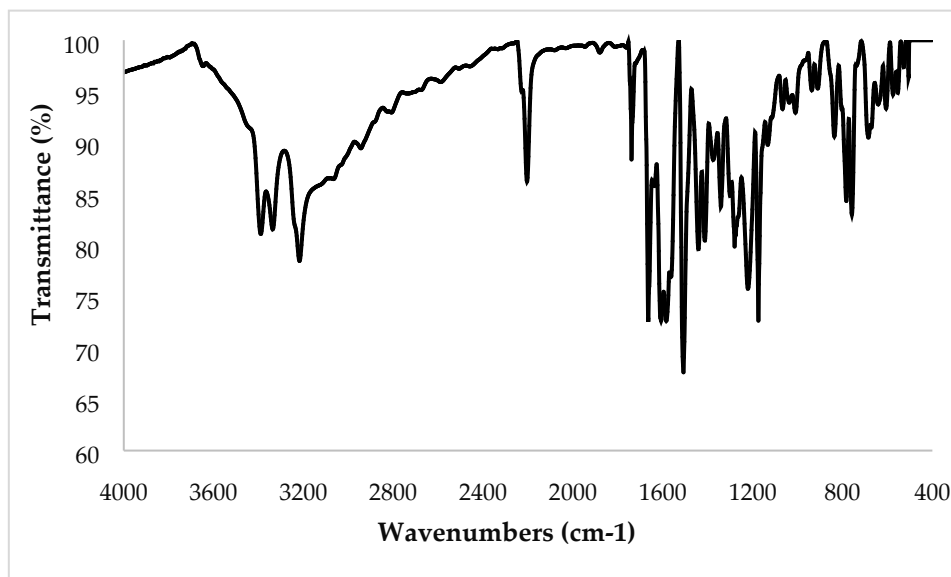

Fig S22. IR spectrum for 2-amino-4-(4-hydroxyphenyl)-10-methyl-8-phenyl-6,8-dihydro-5H-pyrazolo[3,4-j][1,7]phenanthroline-3-carbonitrile (5g)

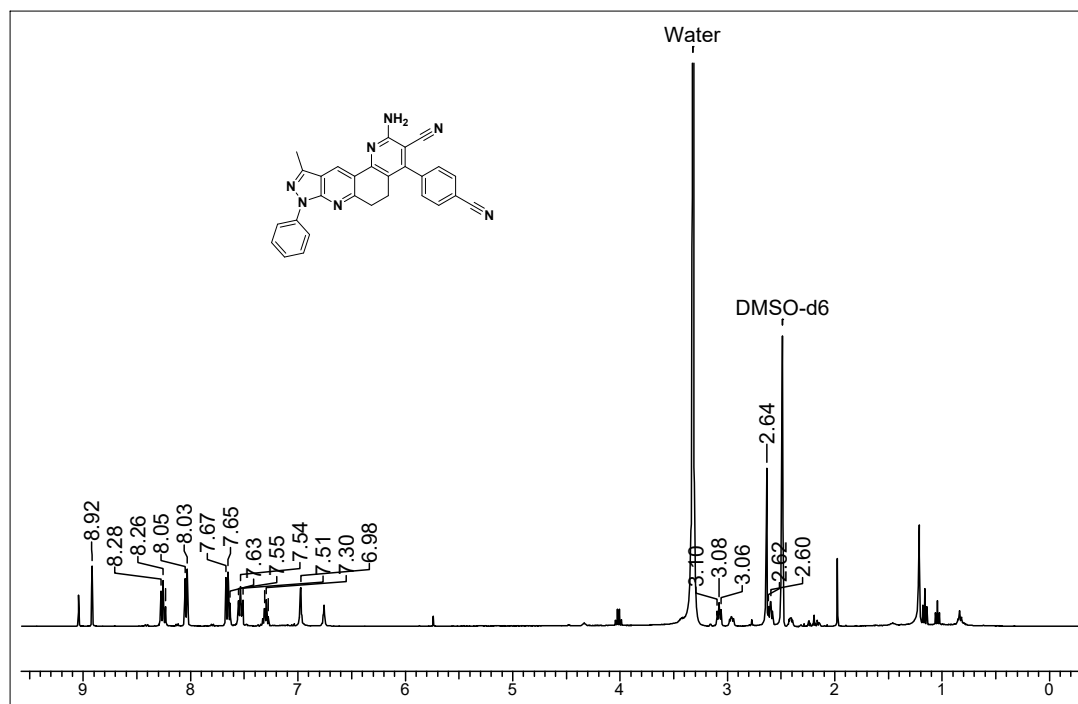

Fig S23. <sup>1</sup>H NMR for 2-amino-4-(4-cyanophenyl)-10-methyl-8-phenyl-6,8-dihydro-5H-pyrazolo[3,4-j][1,7]phenanthroline-3-carbonitrile (5h)

EP-K-CN 345 (3.545)

TOF MS ES+  
776

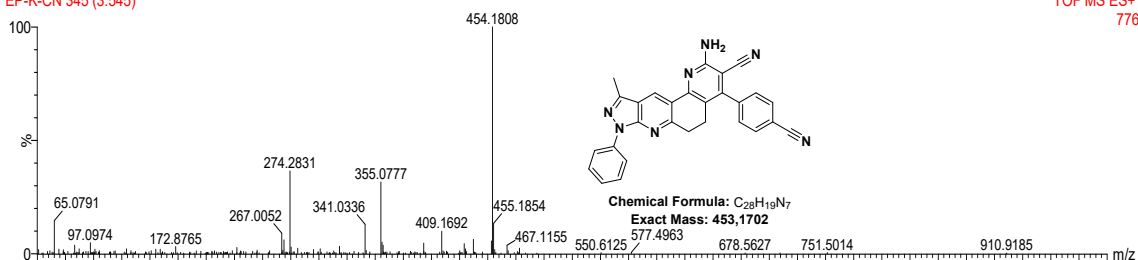

**Fig S24.** HRMS for 2-amino-4-(4-cyanophenyl)-10-methyl-8-phenyl-6,8-dihydro-5H-pyrazolo[3,4-j][1,7]phenanthroline-3-carbonitrile (**5h**)

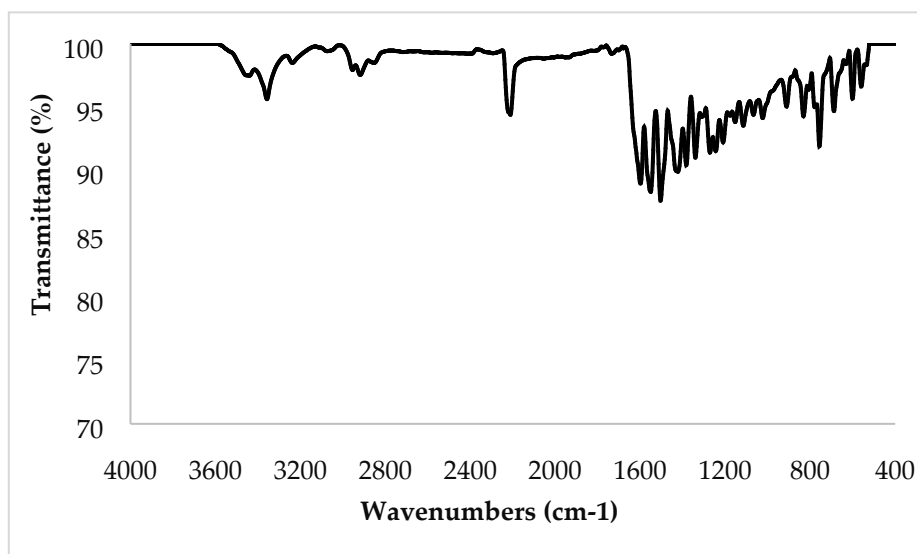

**Fig S25.** IR spectrum for 2-amino-4-(4-cyanophenyl)-10-methyl-8-phenyl-6,8-dihydro-5H-pyrazolo[3,4-j][1,7]phenanthroline-3-carbonitrile (**5h**)

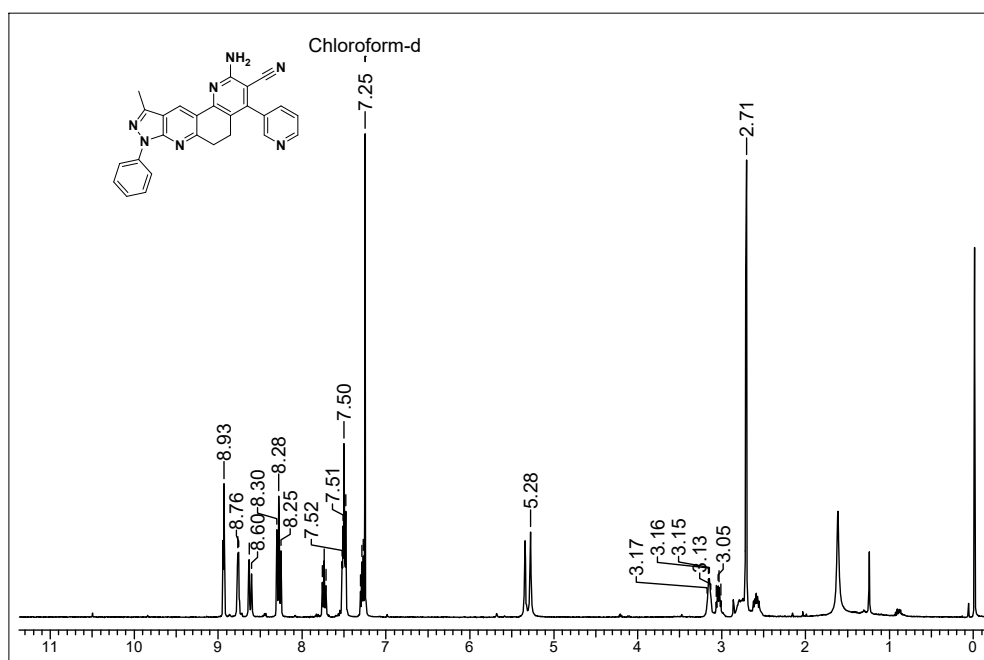

**Fig S26.**  $^1\text{H}$  NMR for 2-amino-10-methyl-8-phenyl-4-(pyridin-3-yl)-6,8-dihydro-5H-pyrazolo[3,4-j][1,7]phenanthroline-3-carbonitrile (**5i**)

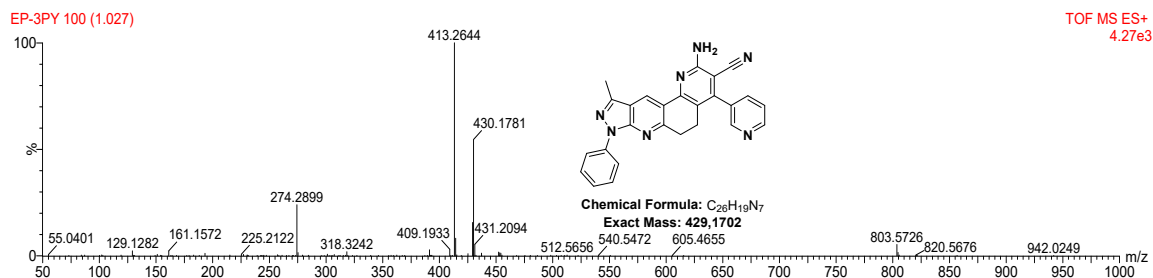

Fig S27. HRMS for 2-amino-10-methyl-8-phenyl-4-(pyridin-3-yl)-6,8-dihydro-5H-pyrazolo[3,4-j][1,7]phenanthroline-3-carbonitrile (**5i**)

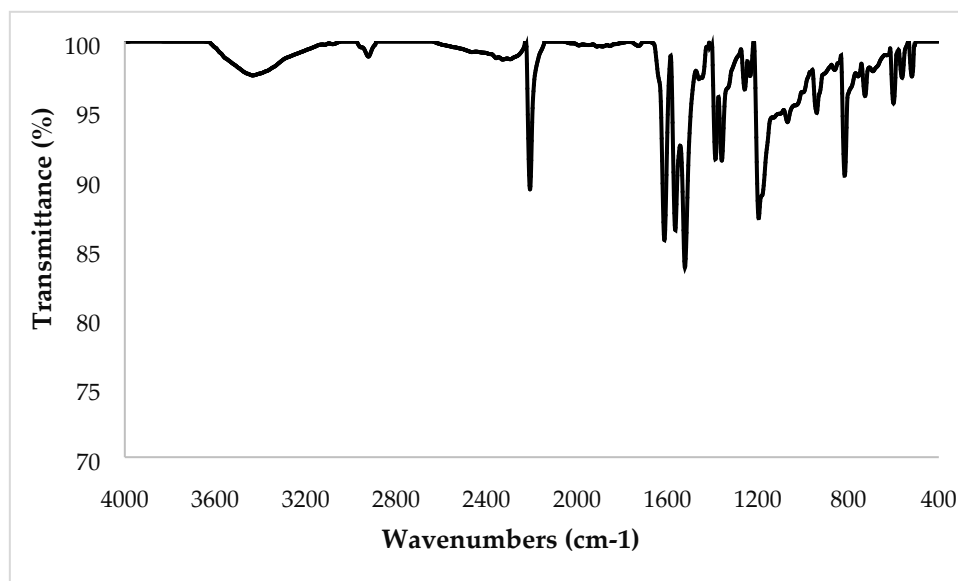

Fig S28. IR spectrum for 2-amino-10-methyl-8-phenyl-4-(pyridin-3-yl)-6,8-dihydro-5H-pyrazolo[3,4-j][1,7]phenanthroline-3-carbonitrile (**5i**)

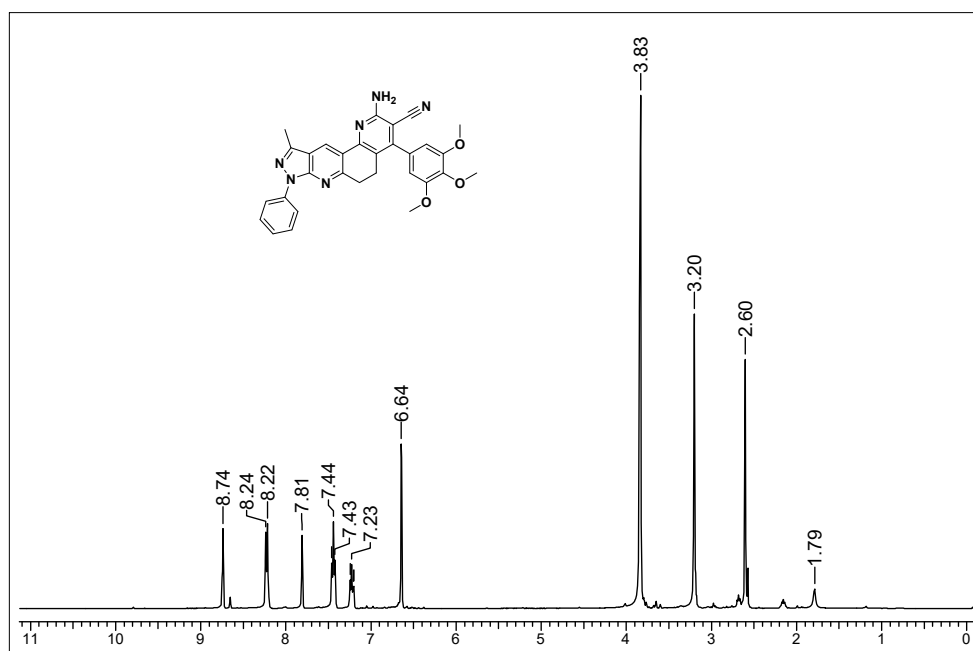

Fig S29. <sup>1</sup>H NMR for 2-amino-10-methyl-8-phenyl-4-(3,4,5-trimethoxyphenyl)-6,8-dihydro-5H-pyrazolo[3,4-j][1,7]phenanthroline-3-carbonitrile (**5j**)

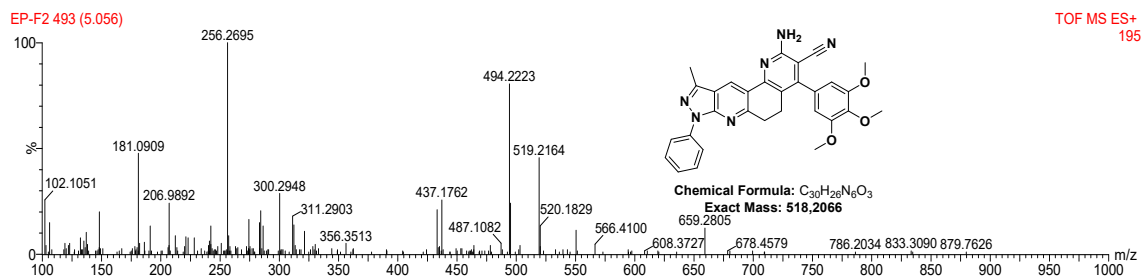

Fig S30. HRMS for 2-amino-10-methyl-8-phenyl-4-(3,4,5-trimethoxyphenyl)-6,8-dihydro-5H-pyrazolo[3,4-j][1,7]phenanthroline-3-carbonitrile (5j)

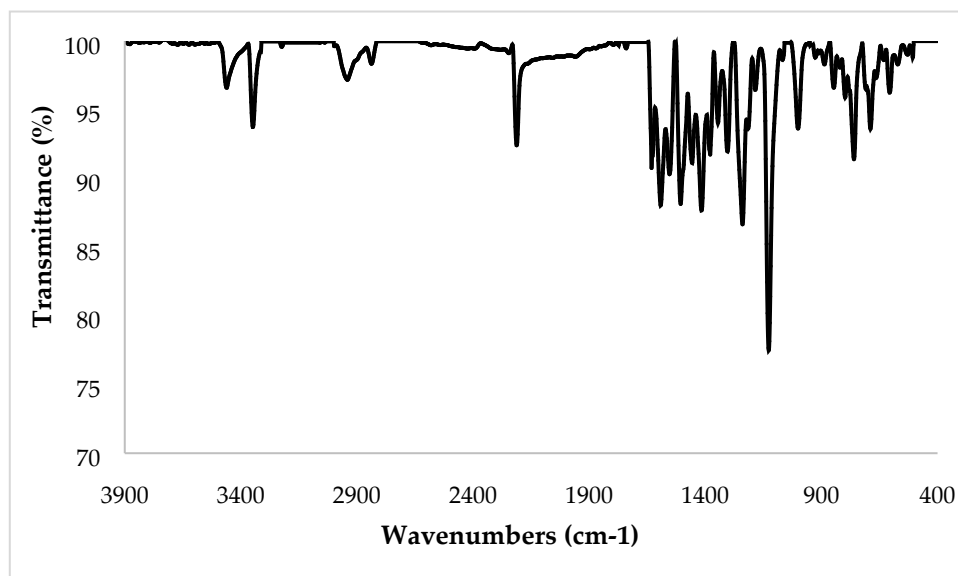

Fig S31. IR spectrum for 2-amino-10-methyl-8-phenyl-4-(3,4,5-trimethoxyphenyl)-6,8-dihydro-5H-pyrazolo[3,4-j][1,7]phenanthroline-3-carbonitrile (5j)

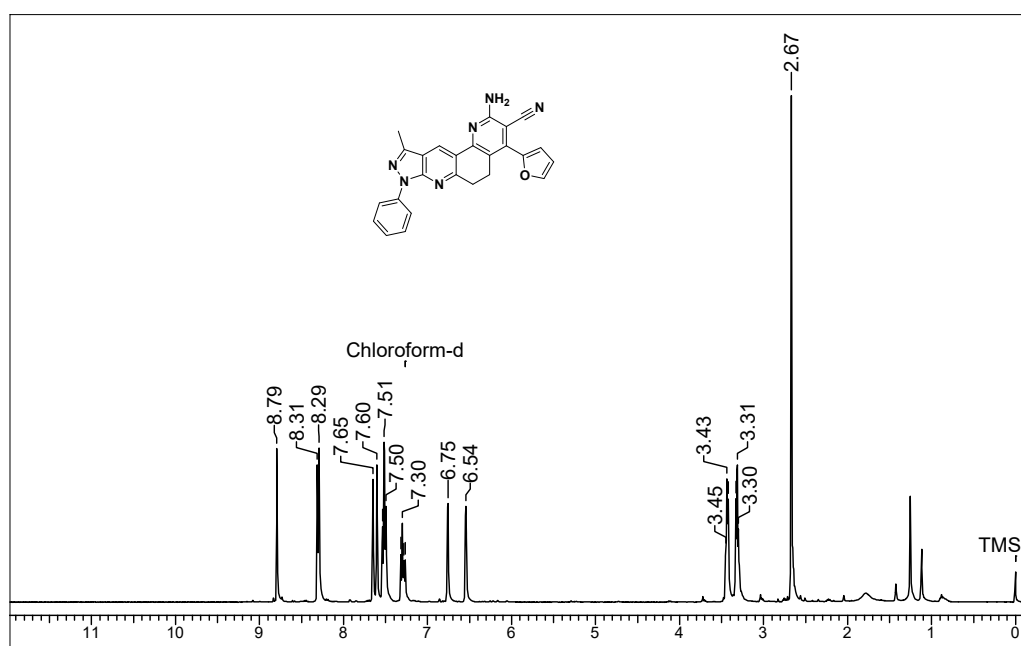

Fig S32.  $^1H$  NMR for 2-amino-4-(furan-2-yl)-10-methyl-8-phenyl-6,8-dihydro-5H-pyrazolo[3,4-j][1,7]phenanthroline-3-carbonitrile(5k)

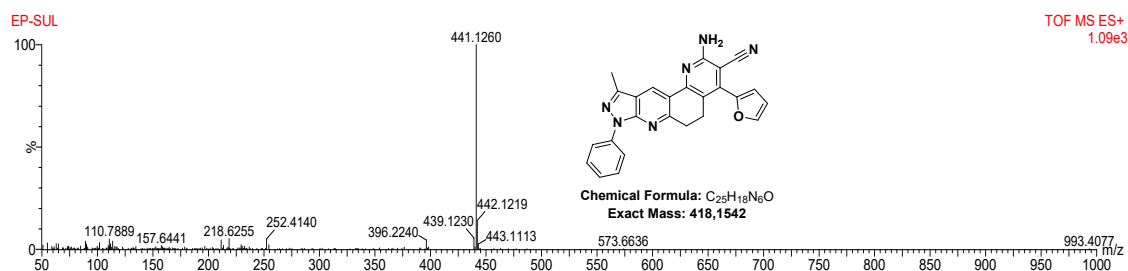

Fig S33. HRMS for 2-amino-4-(furan-2-yl)-10-methyl-8-phenyl-6,8-dihydro-5H-pyrazolo[3,4-j][1,7]phenanthroline-3-carbonitrile(5k)

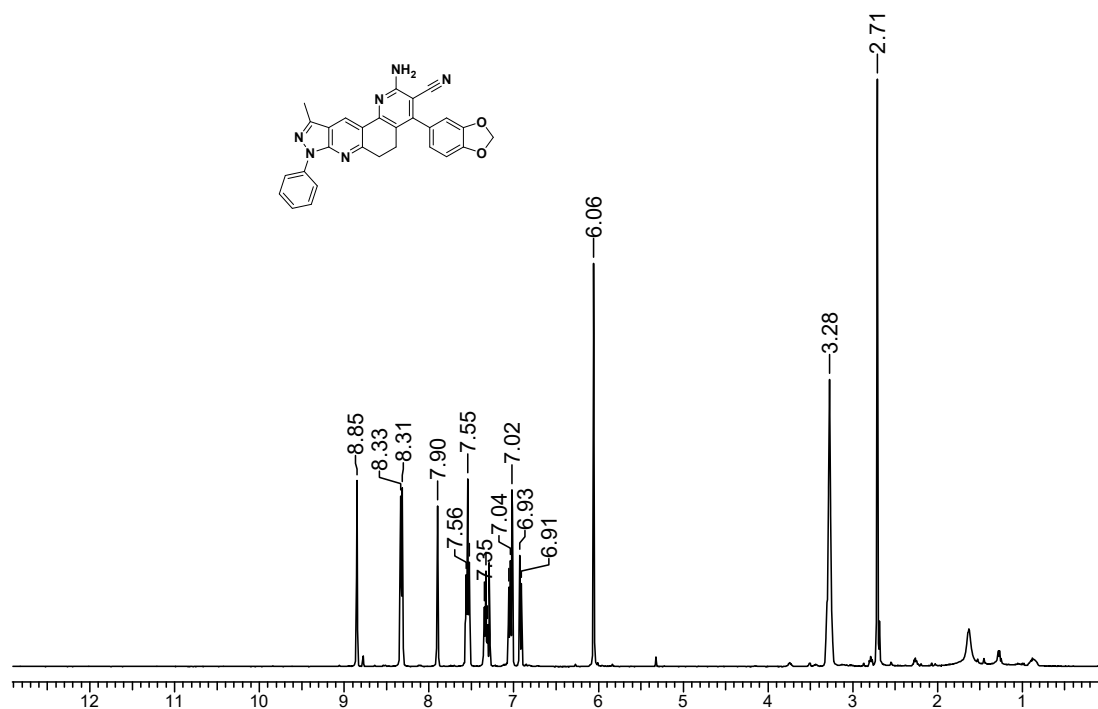

Fig S34.  $^1H$ NMR 2-amino-4-(benzo[d][1,3]dioxol-5-yl)-10-methyl-8-phenyl-6,8-dihydro-5H-pyrazolo[3,4-j][1,7]phenanthroline-3-carbonitrile (5l)

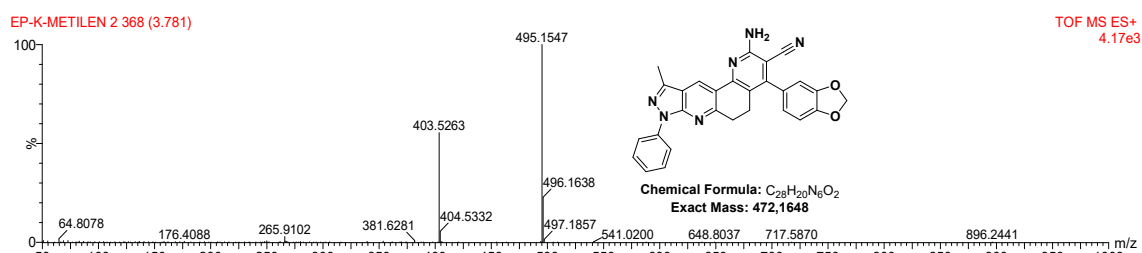

Fig S35. HRMS for 2-amino-4-(benzo[d][1,3]dioxol-5-yl)-10-methyl-8-phenyl-6,8-dihydro-5H-pyrazolo[3,4-j][1,7]phenanthroline-3-carbonitrile (5l)

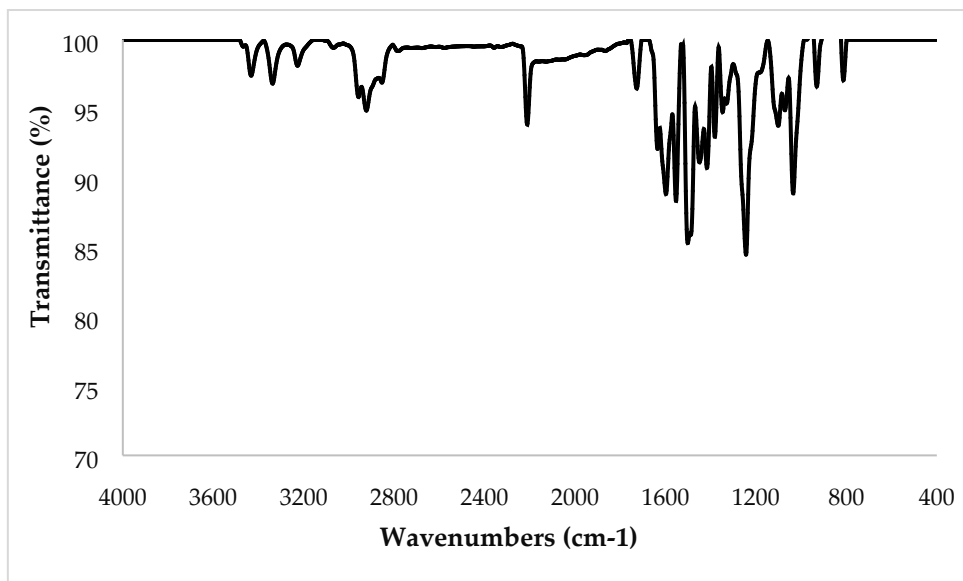

**Fig S36.** IR spectrum for 2-amino-4-(benzo[d][1,3]dioxol-5-yl)-10-methyl-8-phenyl-6,8-dihydro-5*H*-pyrazolo[3,4-*j*][1,7]phenanthroline-3-carbonitrile (**5l**)

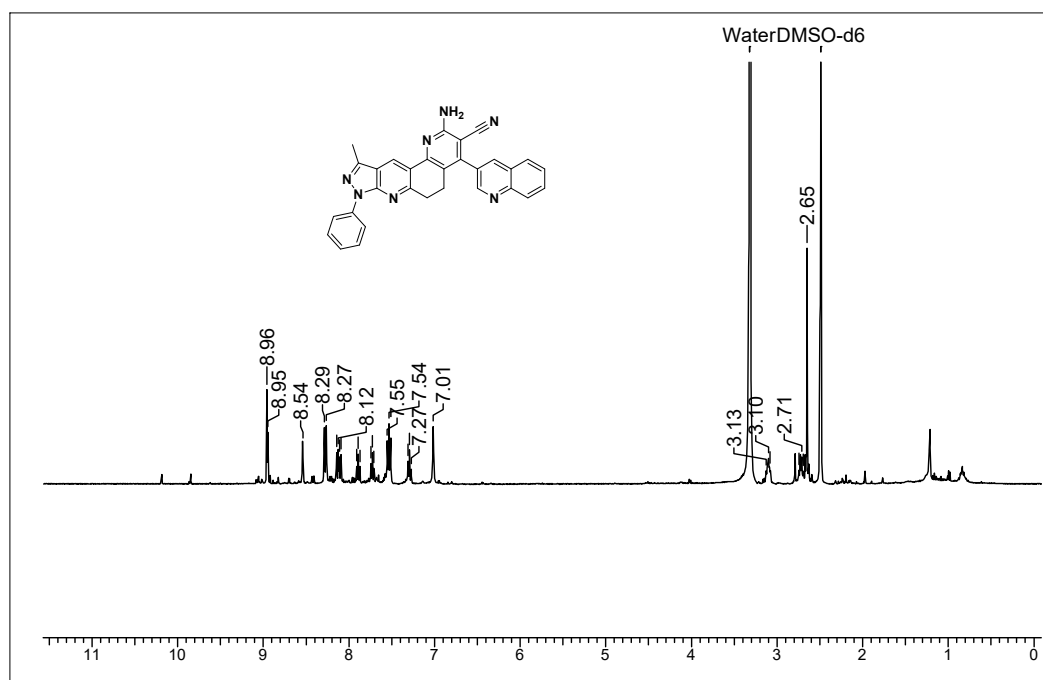

**Fig S37.** <sup>1</sup>H NMR for 2-amino-10-methyl-8-phenyl-4-(quinolin-3-yl)-6,8-dihydro-5*H*-pyrazolo[3,4-*j*][1,7]phenanthroline-3-carbonitrile (**5m**)

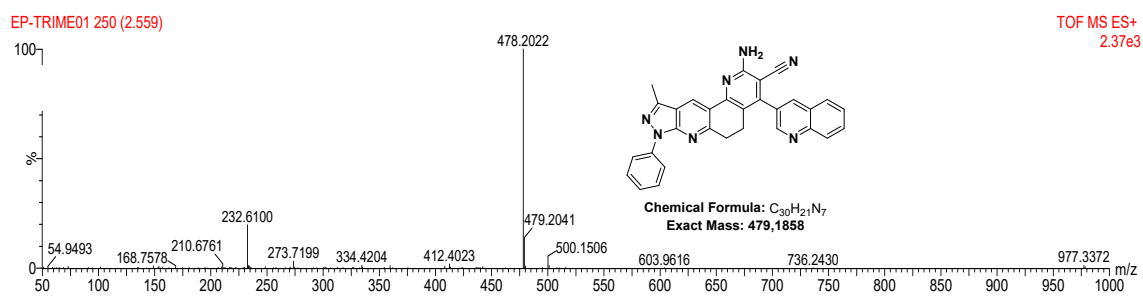

**Fig S38.** HRMS for 2-amino-10-methyl-8-phenyl-4-(quinolin-3-yl)-6,8-dihydro-5H-pyrazolo[3,4-j][1,7]phenanthroline-3-carbonitrile (**5m**)

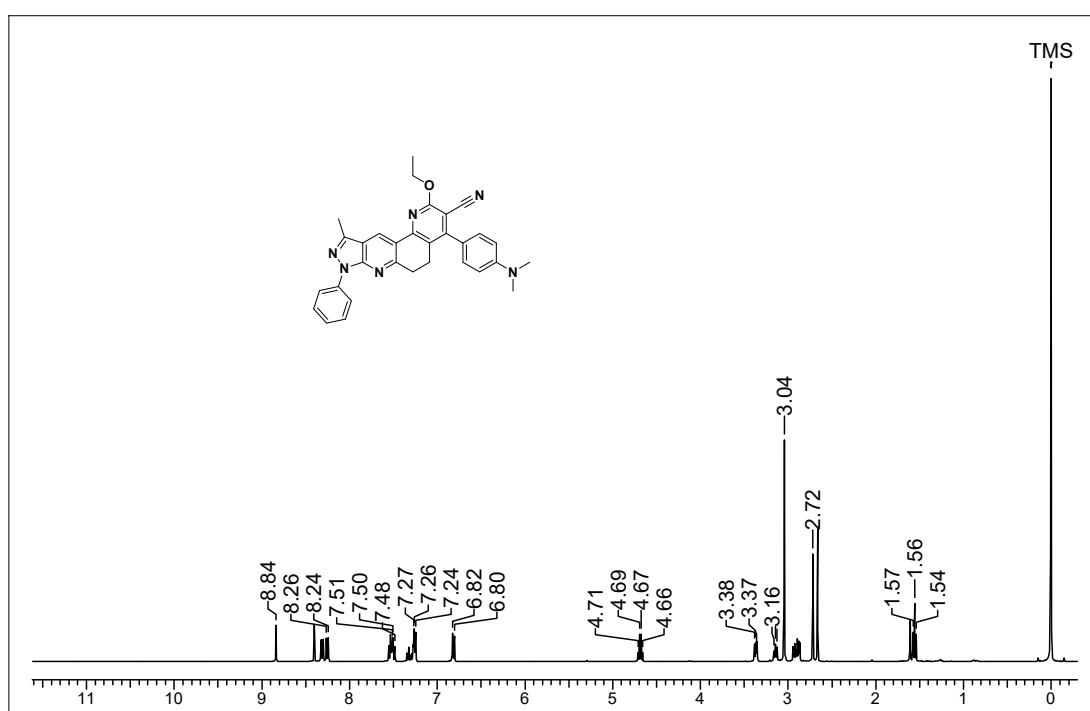

**Fig S39.** <sup>1</sup>H NMR for 4-(4-(dimethylamino)phenyl)-2-ethoxy-10-methyl-8-phenyl-6,8-dihydro-5H-pyrazolo[3,4-j][1,7]phenanthroline-3-carbonitrile (**5n**)

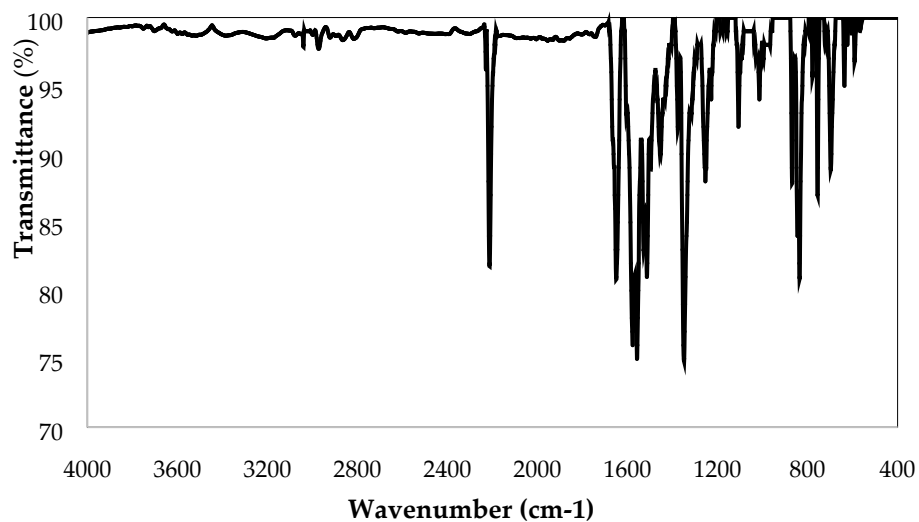

**Fig S40.** IR spectrum for 4-(4-(dimethylamino)phenyl)-2-ethoxy-10-methyl-8-phenyl-6,8-dihydro-5H-pyrazolo[3,4-j][1,7]phenanthroline-3-carbonitrile (**5n**)

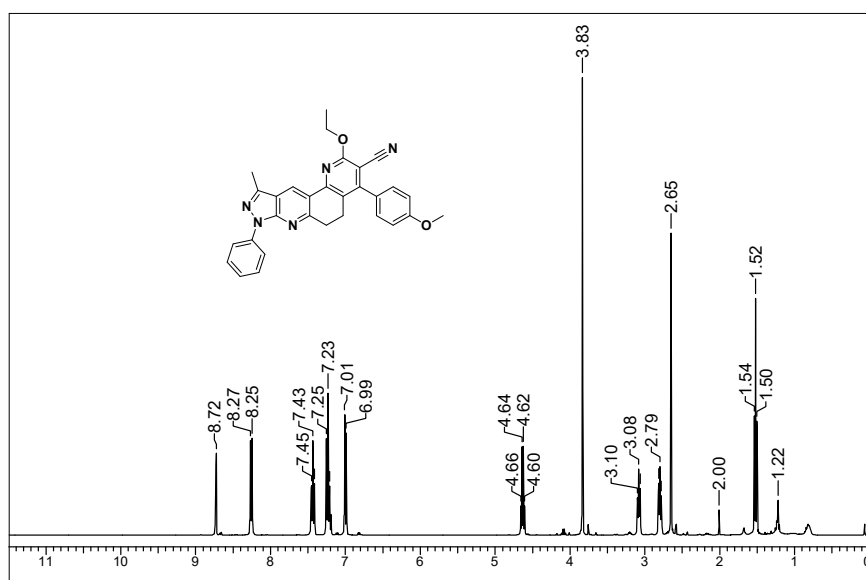

**Fig S41.** <sup>1</sup>H NMR for 2-ethoxy-4-(4-methoxyphenyl)-10-methyl-8-phenyl-6,8-dihydro-5H-pyrazolo[3,4-j][1,7]phenanthroline-3-carbonitrile (**5o**)



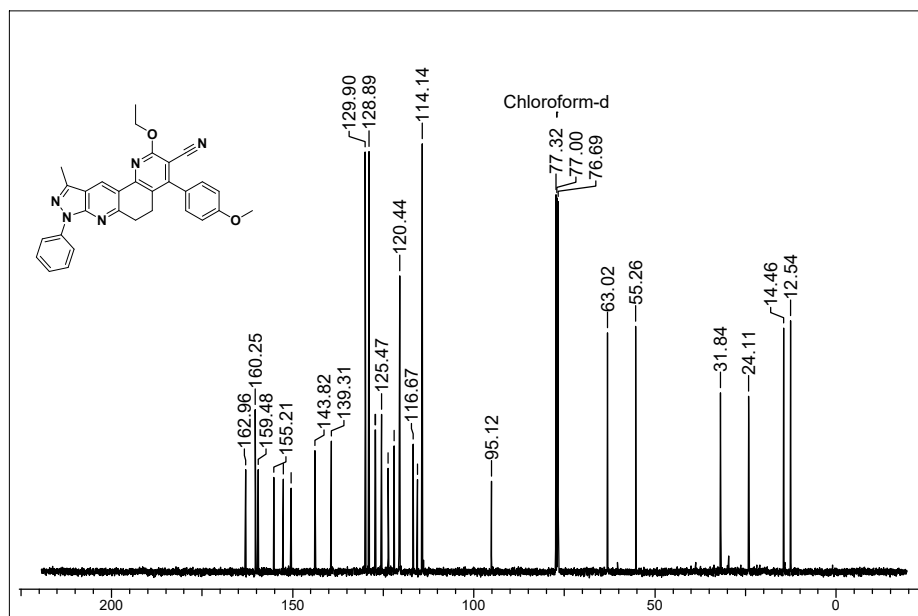

**Fig S42.**  $^{13}\text{C}$  NMR for 2-ethoxy-4-(4-methoxyphenyl)-10-methyl-8-phenyl-6,8-dihydro-5H-pyrazolo[3,4-j][1,7]phenanthroline-3-carbonitrile (**5o**)

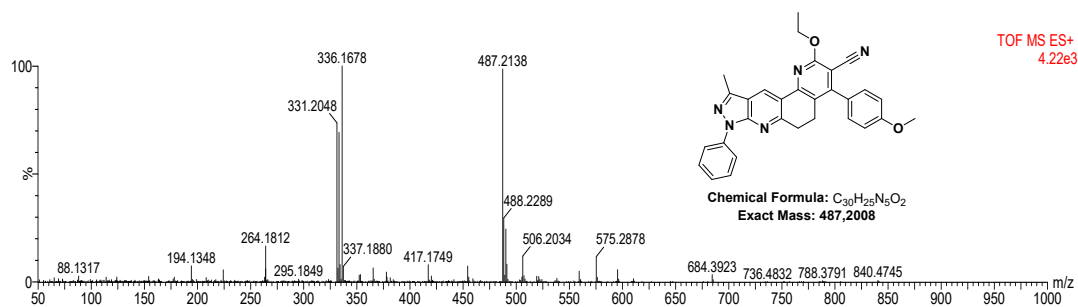

**Fig S43.** HRMS for 2-ethoxy-4-(4-methoxyphenyl)-10-methyl-8-phenyl-6,8-dihydro-5H-pyrazolo[3,4-j][1,7]phenanthroline-3-carbonitrile (**5o**)

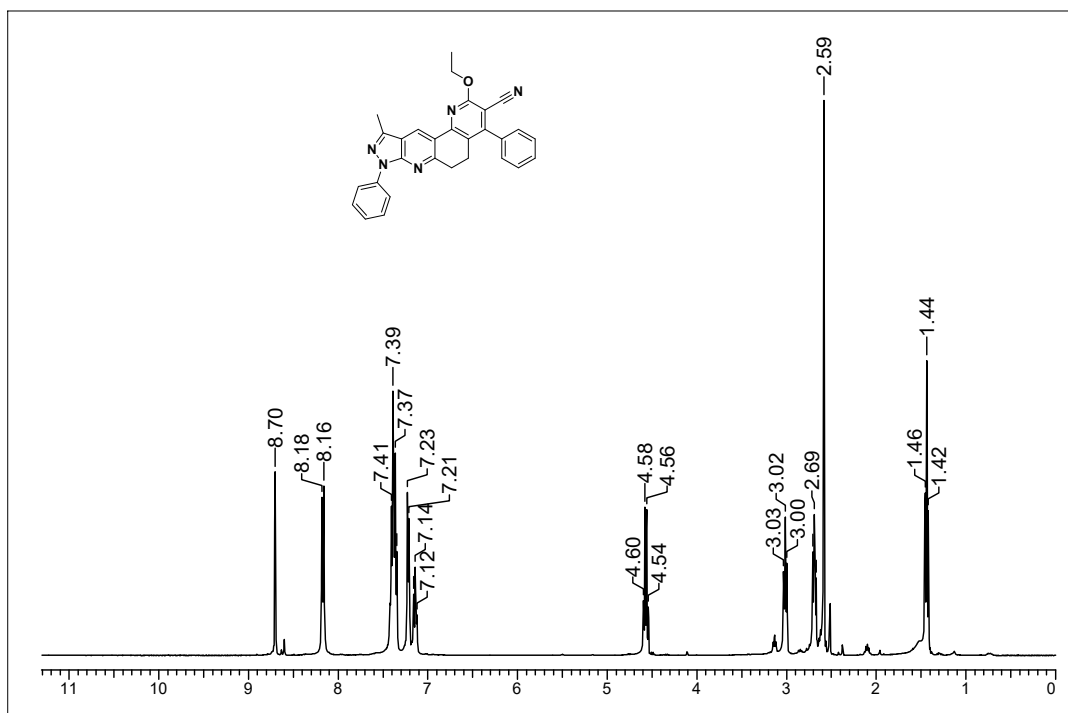

Fig S44.  $^1\text{H}$  NMR for 2-ethoxy-10-methyl-4,8-diphenyl-6,8-dihydro-5H-pyrazolo[3,4-j][1,7]phenanthroline-3-carbonitrile (5p)

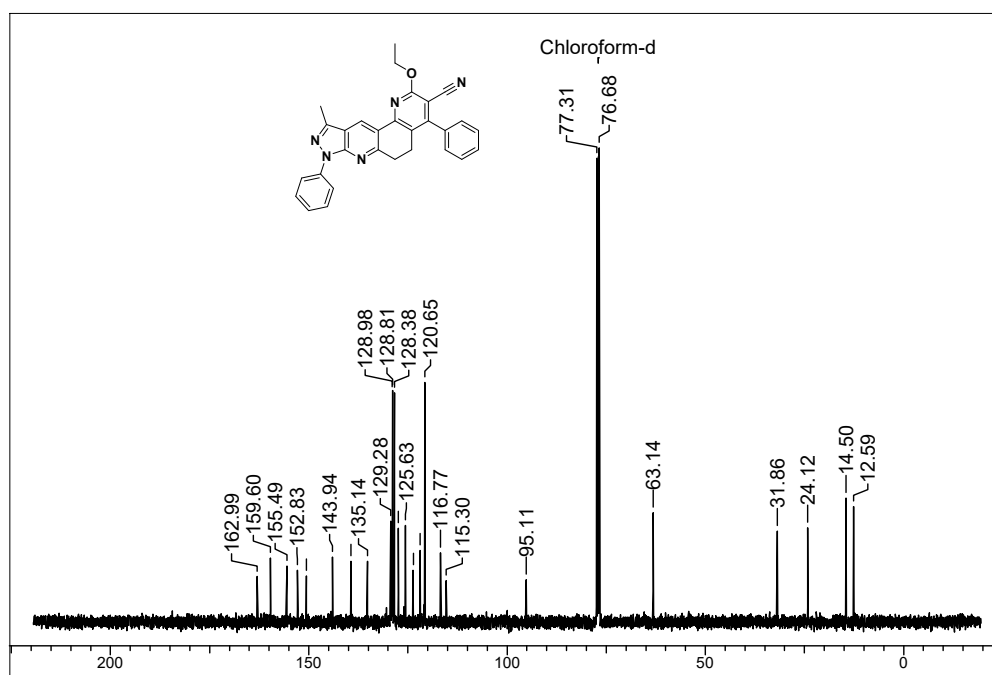

Fig S45.  $^{13}\text{C}$  NMR for 2-ethoxy-10-methyl-4,8-diphenyl-6,8-dihydro-5H-pyrazolo[3,4-j][1,7]phenanthroline-3-carbonitrile (5p)

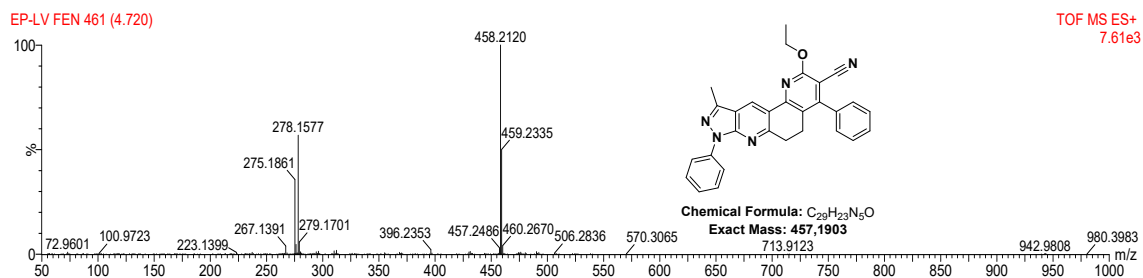

Fig S46. HRMS for 2-ethoxy-10-methyl-4,8-diphenyl-6,8-dihydro-5H-pyrazolo[3,4-j][1,7]phenanthroline-3-carbonitrile (5p)

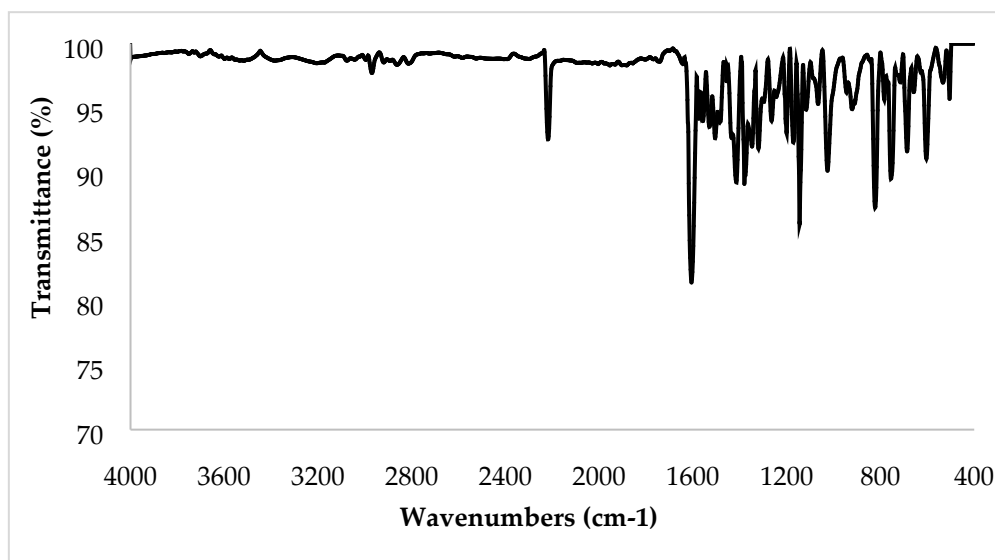

Fig S47. IR spectrum for 2-ethoxy-10-methyl-4,8-diphenyl-6,8-dihydro-5H-pyrazolo[3,4-j][1,7]phenanthroline-3-carbonitrile (5p)

Table S1. Main descriptors for the series (5a-p) calculated with SwissADME

| Entry | MW (g/mol) | Acceptor HB <sup>a</sup> | Donor HB <sup>b</sup> | PSA (Å <sup>2</sup> ) <sup>c</sup> | log P (o/w) <sup>d</sup> | log S <sup>e</sup> | GI absorption <sub>f</sub> | BBB entry <sup>g</sup> | Rule 5 <sup>h</sup> |
|-------|------------|--------------------------|-----------------------|------------------------------------|--------------------------|--------------------|----------------------------|------------------------|---------------------|
| 5a    | 428,49     | 4                        | 1                     | 9341                               | 3,54                     | -6,35              | High                       | No                     | 0                   |
| 5b    | 442,53     | 4                        | 1                     | 9341                               | 3,75                     | -6,65              | High                       | No                     | 0                   |
| 5c    | 458,51     | 5                        | 1                     | 10264                              | 3,88                     | -6,42              | High                       | No                     | 0                   |
| 5d    | 462,95     | 4                        | 1                     | 9341                               | 3,93                     | -6,94              | High                       | No                     | 0                   |
| 5e    | 473,49     | 6                        | 1                     | 13923                              | 3,10                     | -6,40              | Low                        | No                     | 0                   |
| 5f    | 513,98     | 5                        | 1                     | 10630                              | 3,89                     | -7,65              | Low                        | No                     | 1                   |
| 5g    | 444,49     | 5                        | 2                     | 11364                              | 3,13                     | -6,21              | High                       | No                     | 0                   |
| 5h    | 453,50     | 5                        | 1                     | 11720                              | 3,39                     | -6,29              | Low                        | No                     | 0                   |
| 5i    | 429,48     | 5                        | 1                     | 10630                              | 3,22                     | -5,68              | High                       | No                     | 0                   |
| 5j    | 518,57     | 7                        | 1                     | 12110                              | 4,28                     | -6,56              | Low                        | No                     | 1                   |
| 5k    | 472,50     | 6                        | 1                     | 11187                              | 3,82                     | -6,46              | High                       | No                     | 0                   |
| 5l    | 418,45     | 5                        | 1                     | 10655                              | 3,37                     | -5,71              | High                       | No                     | 0                   |
| 5m    | 479,53     | 5                        | 1                     | 10630                              | 3,60                     | -6,85              | Low                        | No                     | 0                   |
| 5n    | 500,59     | 5                        | 0                     | 7986                               | 4,79                     | -6,89              | High                       | No                     | 1                   |
| 5o    | 487,55     | 6                        | 0                     | 8585                               | 4,69                     | -6,73              | High                       | No                     | 0                   |
| 5p    | 457,53     | 5                        | 0                     | 7662                               | 4,51                     | -6,66              | High                       | No                     | 0                   |

<sup>a</sup>Estimated number of H bonds that are accepted by the solute of water molecules in an aqueous solution. <sup>b</sup> Estimated number of H bonds donated by the solute to water molecules in an aqueous

solution. <sup>c</sup> Van der Waals polar surface area for nitrogen and oxygen atoms. <sup>d</sup> log P for octanol / water (-2.0 to -6.5). <sup>e</sup> Predicted aqueous solubility, log S, S in mol/dm<sup>3</sup> (-6.5 to 0.5). <sup>f</sup> Gastrointestinal absorption according to BOILED-Egg diagram. <sup>g</sup> Permeability of the blood-brain barrier (BBB). <sup>h</sup> Number of violations of Lipinski's rule of five. The rules are: PM <500, log P o/w <5, donor HB ≤ 5, accept HB ≤ 10. Compounds that meet these rules are considered drugs. (The "five" refers to the limits, which are multiples of 5.)

**Table S2.** Frontier molecular orbitals energies ( $E_{\text{HOMO}}$  and  $E_{\text{LUMO}}$ ), electronegativity ( $\chi$ ), chemical hardness ( $\eta$ ), chemical softness (S) and electron affinity (EA).

| Entry | $E_{\text{HOMO}}$<br>(eV) | $E_{\text{LUMO}}$<br>(eV) | $\Delta E$ (eV) | $\chi$ (eV) | $\eta$ (eV) | S (eV) <sup>-1</sup> | EA (eV) |
|-------|---------------------------|---------------------------|-----------------|-------------|-------------|----------------------|---------|
| 5a    | -5,66                     | -1,92                     | 3,74            | 3,79        | 1,87        | 0,53                 | 1,92    |
| 5b    | -5,64                     | -1,89                     | 3,75            | 3,76        | 1,88        | 0,53                 | 1,89    |
| 5c    | -5,63                     | -1,86                     | 3,77            | 3,74        | 1,88        | 0,53                 | 1,86    |
| 5d    | -5,73                     | -2,03                     | 3,7             | 3,88        | 1,85        | 0,54                 | 2,03    |
| 5e    | -5,83                     | -2,64                     | 3,19            | 4,24        | 1,6         | 0,63                 | 2,64    |
| 5f    | -5,68                     | -2,04                     | 3,64            | 3,86        | 1,82        | 0,55                 | 2,04    |
| 5g    | -5,6                      | -1,87                     | 3,73            | 3,74        | 1,87        | 0,54                 | 1,87    |
| 5h    | -5,82                     | -2,22                     | 3,6             | 4,02        | 1,8         | 0,56                 | 2,22    |
| 5i    | -5,61                     | -1,66                     | 3,95            | 3,64        | 1,98        | 0,51                 | 1,66    |
| 5j    | -5,32                     | -1,75                     | 3,57            | 3,53        | 1,78        | 0,56                 | 1,75    |
| 5k    | -5,64                     | -1,90                     | 3,74            | 3,77        | 1,87        | 0,53                 | 1,9     |
| 5l    | -5,69                     | -2,04                     | 3,64            | 3,86        | 1,82        | 0,55                 | 2,04    |
| 5m    | -5,63                     | -2,08                     | 3,55            | 3,86        | 1,78        | 0,56                 | 2,08    |
| 5n    | -5,61                     | -1,88                     | 3,73            | 3,74        | 1,87        | 0,54                 | 1,88    |
| 5o    | -5,73                     | -2,04                     | 3,69            | 3,88        | 1,84        | 0,54                 | 2,04    |
| 5p    | -5,7                      | -1,99                     | 3,71            | 3,84        | 1,86        | 0,54                 | 1,99    |
| 5q    | -5,27                     | -1,86                     | 3,41            | 3,57        | 1,7         | 0,59                 | 1,86    |

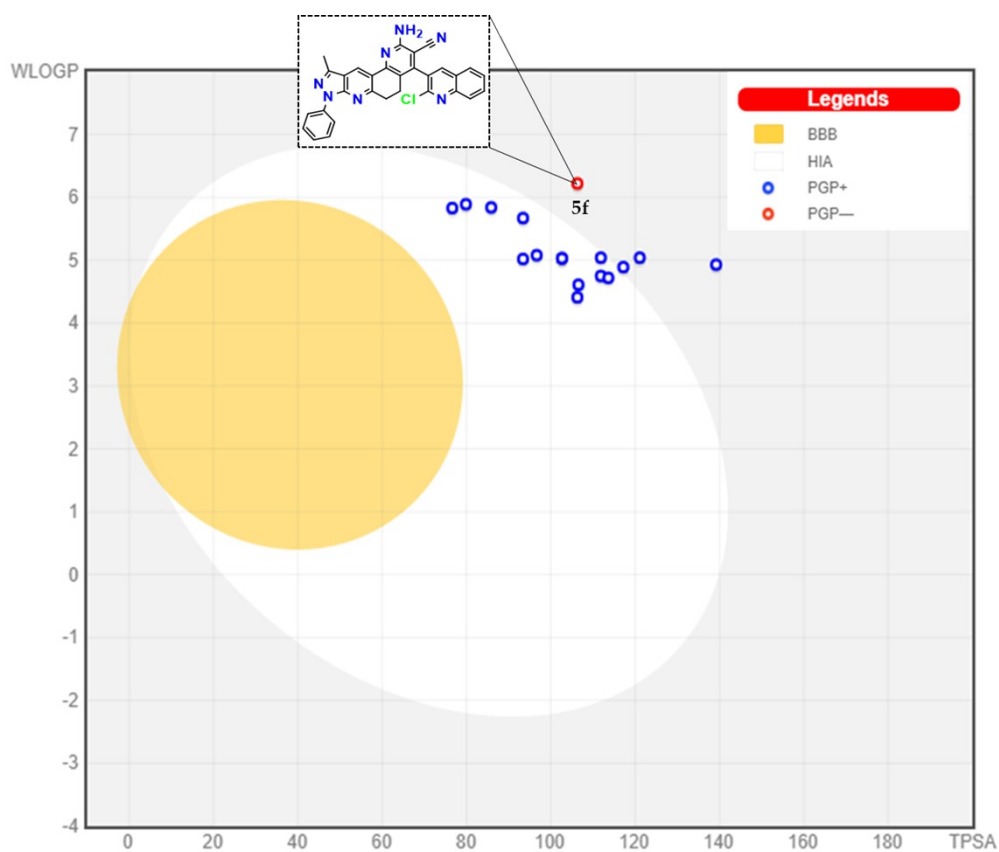

**Fig S48.** Pharmacokinetic profile of the compounds **5a-p**. BOILED-Egg diagram of synthesized compounds. White region: high probability of passive absorption by the gastrointestinal tract; yellow region (yolk): high probability of brain penetration. Yolk and the white region are not mutually exclusive. Bluepoint: P-gp substrate. Redpoint: No P-gp substrate.
